# Supplementary figures and images for: Small molecules inhibiting the nuclear localization of YAP/TAZ for chemotherapeutics and chemosensitizers against breast cancers
Source: PubMed Central journal article supplement — FEBS Open Bio. 2015 Jun 22;5:542–9. doi: 10.1016/j.fob.2015.06.007 (PMC4506957; doi:10.1016/j.fob.2015.06.007), 2015-06-22

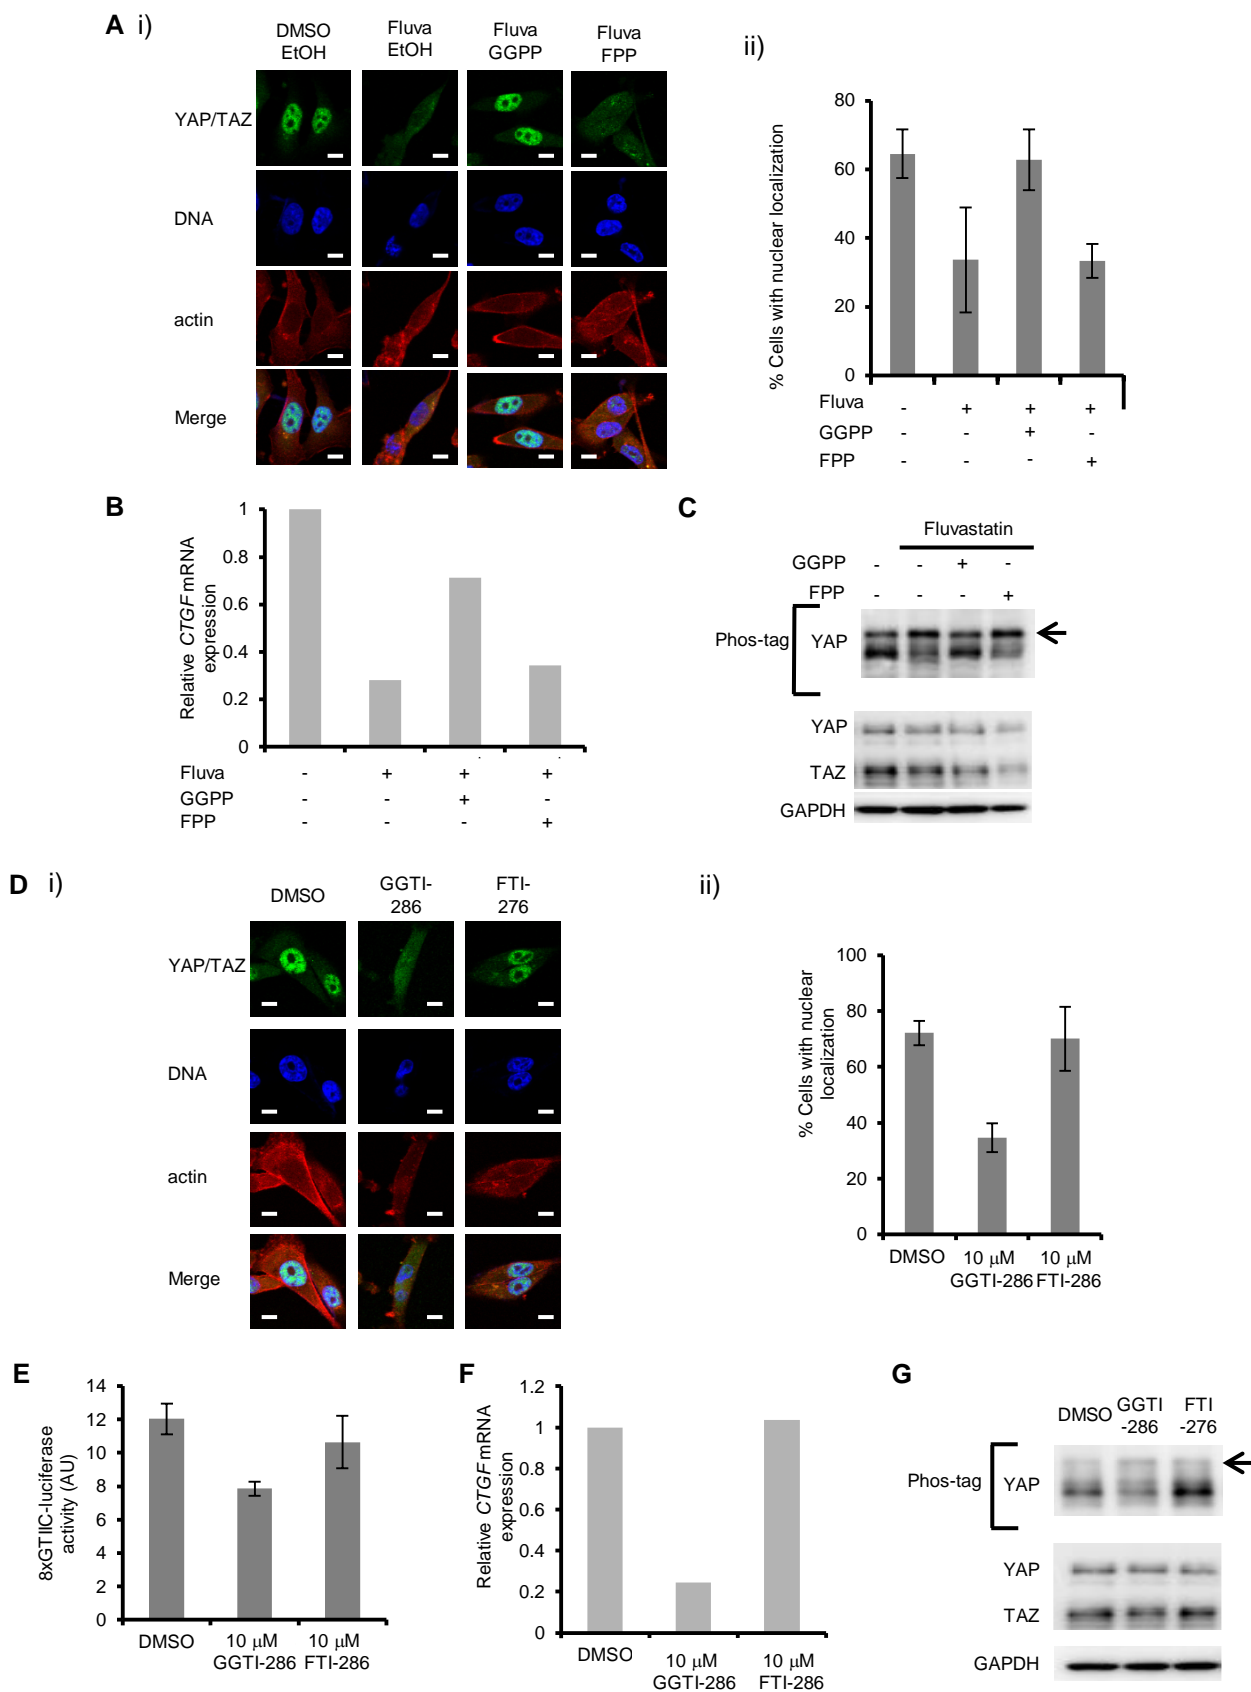

**Supplemental figure S1**

Supplement: mmc1.pdf [file mmc1.pdf]
